# Supplementary material for: Disulfide cross-linked cholic-acid modified PEG–poly(amino acid) block copolymer micelles for controlled drug delivery of doxorubicin
Source: Royal Society of Chemistry journal article supplement (doi:10.1039/c5ra02553b), 2015-01-01
Supplement: c5ra02553b1.pdf [file c5ra02553b1.pdf]

Supporting Information for

# Disulfide cross-linked cholic-acid modified PEG-poly(amino acid) block copolymer micelles for controlled drug delivery of doxorubicin

5 Yuling Li,<sup>\*a</sup> Yuling Shen,<sup>a</sup> Sai Wang,<sup>a</sup> Dandan Zhu,<sup>a</sup> Baixiang Du<sup>a</sup> and Jihong Jiang<sup>b</sup>

<sup>a</sup> School of Chemistry and Chemical Engineering, Jiangsu Normal University, Xuzhou 221116, P. R. China.

<sup>b</sup> Key Laboratory of Biotechnology for Medicinal Plant of Jiangsu Province, Jiangsu Normal University, 10 Xuzhou 221116, P. R. China.

\*Corresponding Author. Tel: +86-516-83403165; E-mail: ylli19722@163.com

15

20

25

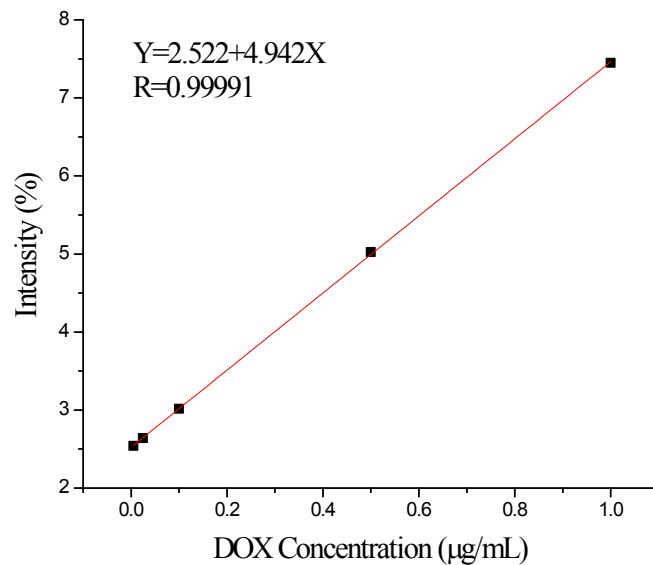

**Figure S1.** The calibration curve of DOX in PB (10 mM, pH 7.4) based on fluorescence measurements (at 560 nm).

5

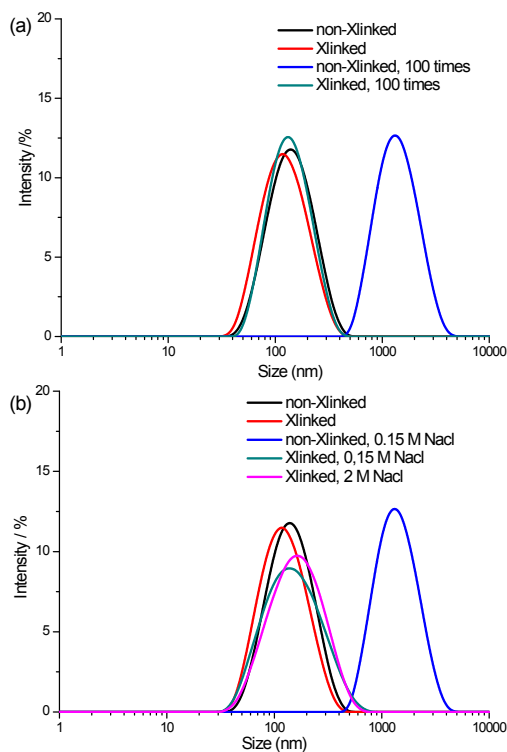

**Figure S2.** Stability of cross-linked PEG-pGlu (EDA-LA)<sub>15</sub>-CA micelles against a) 100-fold dilution, b) 0.15 M or 2 M NaCl. The parent non-cross-linked micelles were used as a control.

15

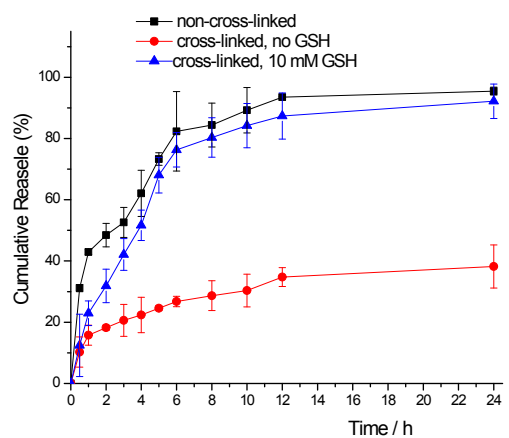

**Figure S3.** DOX release from core-cross-linked PEG-pGlu (EDA-LA)<sub>26</sub>-CA micelles in PB buffer (10 mM) at 37 °C. Non-cross-linked micelles were used as a control. Data are presented as mean ± SD (n = 3).
